# Supplementary material for: Exosomal miR-34b inhibits proliferation and the epithelial-mesenchymal transition by targeting Notch2 in ovarian cancer
Source: PubMed Central journal article supplement — Oncol Lett. 2020 Jul 9;20(3):2721–8. doi: 10.3892/ol.2020.11837 (PMC7400462; doi:10.3892/ol.2020.11837), 2020-07-09

Figure S1. Relative expression levels of miR-34b in IOSE-80 and ovarian cancer cell lines. \*P<0.05, \*\*P<0.01 vs. IOSE-80. miR, microRNA.

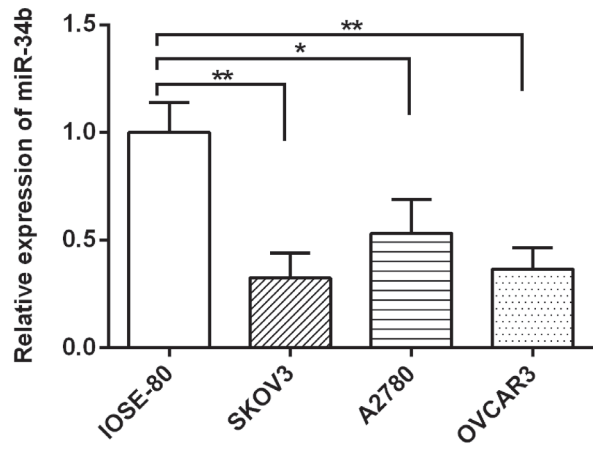

Figure S2. Relative expression levels of miR-34b in SKOV3 cells co-cultured with SKOV3, IOSE-80, IOSE-80+NC or IOSE-80+anti-miR-34b.  $^{$$$}P < 0.001$  vs. SK-Exos,  $^{\#}P < 0.05$  vs. NC-Exos. miR, microRNA; SK, SKOV3; IO, IOSE-80; NC, negative control; Exos, exosomes.

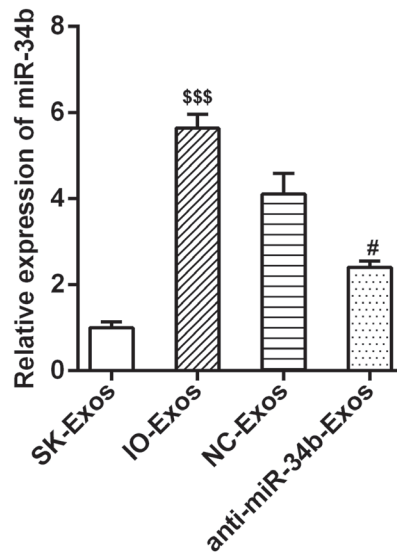

Figure S3. Western blotting of Notch2 in SKOV3 cells transfected with NC or Notch2 siRNAs. NC, negative control; si, small interfering.

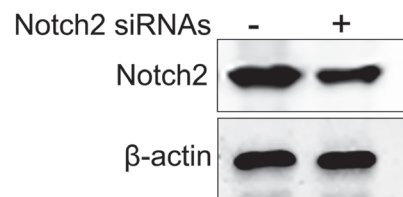

Supplement: Supplementary_Data.pdf [file Supplementary_Data.pdf]
